# Supplementary material
Source: Springer Nature journal article supplement (https://www.springermedizin.de/resource/supplementary/12885_2010_2617_MOESM5_ESM.pdf/9461582)

OSA8  
72hr CyQuant Assay

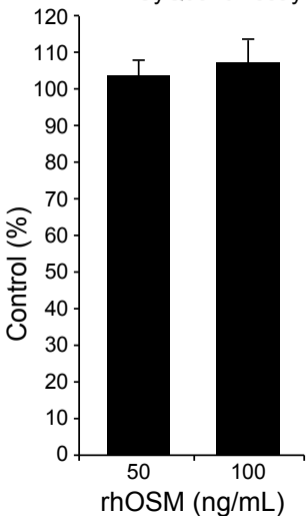

SJSA  
72hr CyQuant Assay

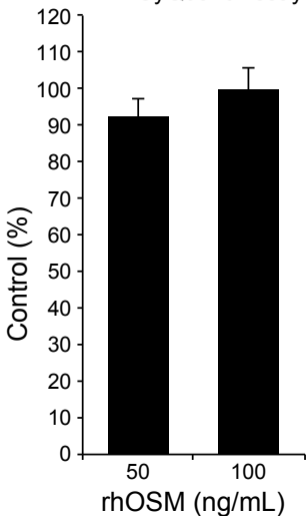

Supplement: MOESM5 [file 9461582]
